# Supplementary material for: Design and synthesis of micron-sized spherical aggregates composed of hollow Fe2O3nanospheres for use in lithium-ion batteries
Source: Royal Society of Chemistry journal article supplement (doi:10.1039/c5nr01391g), 2015-01-01
Supplement: c5nr01391g1.pdf [file c5nr01391g1.pdf]

## Supporting Information

### Design and Synthesis of Micron-Sized Spherical Aggregates Composed of Hollow Fe<sub>2</sub>O<sub>3</sub> Nanospheres for Use in Lithium-Ion Batteries

Jung Sang Cho, Young Jun Hong, Jong-Heun Lee and Yun Chan Kang\*

Department of Materials Science and Engineering, Korea University,  
Anam-Dong, Seongbuk-Gu, Seoul 136-713, Republic of Korea

\*Corresponding author. Tel: +82-2-928-3584; Fax: +82-2-3290-3268

*E-mail address:* [yckang@korea.ac.kr](mailto:yckang@korea.ac.kr)

#### **This file includes:**

- Experimental
- XRD patterns of the powders (a) post-treated at 500 °C under H<sub>2</sub>/Ar mixed gas atmosphere and (b) subsequent heat-treated at 300 °C under air atmosphere.
- XPS spectra of the powders: (a) O 1s spectrum of the Fe-carbon composite powders post-treated at 500 °C under H<sub>2</sub>/Ar mixed gas atmosphere, (b) O 1s spectrum, and (c) Fe 2p spectrum of the hollow Fe<sub>2</sub>O<sub>3</sub> nanosphere aggregates subsequent heat treated at 300 °C under air atmosphere.
- Thermal-analysis of hollow Fe<sub>2</sub>O<sub>3</sub> nanosphere aggregates.
- Morphology and phase analysis of solid Fe<sub>2</sub>O<sub>3</sub> powders prepared by spray pyrolysis: (a) SEM image and (b) XRD pattern

- (a) N<sub>2</sub> gas adsorption and desorption isotherms and pore size distribution of (b) solid Fe<sub>2</sub>O<sub>3</sub> powders, and (c) hollow Fe<sub>2</sub>O<sub>3</sub> nanosphere aggregates.
- SEM images of (a) solid Fe<sub>2</sub>O<sub>3</sub> powders and (b) hollow Fe<sub>2</sub>O<sub>3</sub> nanosphere aggregates obtained after first cycle.
- SEM images of (a) solid Fe<sub>2</sub>O<sub>3</sub> powders and (b) hollow Fe<sub>2</sub>O<sub>3</sub> nanosphere aggregates obtained after 100 cycles.
- TG analysis of Fe-carbon composite powders post-treated at 500 °C under H<sub>2</sub>/Ar mixed gas atmosphere.
- Cyclic voltammetry (CV) curves of solid Fe<sub>2</sub>O<sub>3</sub> powders for the first 7 cycles at a scan rate of 0.1 mV s<sup>-1</sup>.

## Experimental

**Synthesis of hollow  $Fe_2O_3$  nanosphere aggregates and solid  $Fe_2O_3$  powder:** The hollow  $Fe_2O_3$  nanosphere aggregates were prepared with a three-step process. The iron oxide-carbon composite powder was prepared with spray pyrolysis using a spray solution of iron nitrate enneahydrate  $[(Fe(NO_3)_3) \cdot 9H_2O]$  and sucrose. In the spray pyrolysis system used, droplets were generated with a 1.7 MHz ultrasonic spray generator consisting of six vibrators. The droplets were carried to a quartz reactor (length = 1200 mm, diameter = 50 mm) by a carrier gas of  $N_2$  at a flow rate of  $7 \text{ L} \cdot \text{min}^{-1}$ . The reactor temperature was maintained at  $400 \text{ }^\circ\text{C}$ . The concentrations of iron nitrate enneahydrate and sucrose dissolved in distilled water to create the spray solution were 0.1 and 0.1 M, respectively. The first stage of the post-pyrolysis treatment involved heating the iron oxide-carbon composite powder to  $500 \text{ }^\circ\text{C}$  under a 10%  $H_2/Ar$  reducing atmosphere for 10 h to produce the Fe-carbon composite powder. The second stage of the post-pyrolysis treatment involved heating the Fe-carbon composite powder to  $300 \text{ }^\circ\text{C}$  under an oxidizing air atmosphere for 5 h to produce the hollow  $Fe_2O_3$  nanosphere aggregates. For comparison purposes, a solid  $Fe_2O_3$  powder was prepared directly with spray pyrolysis using a spray solution containing only iron nitrate enneahydrate (air atmosphere, temperature =  $500 \text{ }^\circ\text{C}$ ).

**Characterizations:** The microstructure of the powders was observed with field emission scanning electron microscopy (SEM, Hitachi, S-4800) and field emission transmission electron microscopy (TEM, JEOL, JEM-2100F). In addition, their crystal structure was evaluated with X-ray diffraction (XRD, X'Pert PRO MPD) using  $Cu \text{ K}\alpha$  radiation ( $\lambda = 1.5418 \text{ \AA}$ ) at the Korea Basic Science Institute (Daegu). X-ray photoelectron spectroscopy (XPS, Thermo Scientific K-Alpha) with a focused monochromatic  $Al \text{ K}\alpha$  at 12 kV and 20 mA was used to analyze the composition of the specimens. The surface area of the powders was determined with the Brunauer–Emmett–Teller (BET) method, using  $N_2$  as the adsorbate gas. Thermogravimetric analysis (TGA) were performed with a Pyris 1 TGA (Perkin Elmer, temperature range =  $25\text{--}650 \text{ }^\circ\text{C}$ , heating rate =  $10 \text{ }^\circ\text{C min}^{-1}$ , static air atmosphere).

**Electrochemical Measurements:** The electrochemical properties of the powders were analyzed by constructing 2032-type coin cells. The anode was prepared by mixing the active

material, carbon black, and polyacrylic acid (PAA) in a weight ratio of 7:2:1. Li metal and microporous polypropylene film were used as the counter electrode and separator, respectively. The electrolyte was created by dissolving 1 M of  $\text{LiPF}_6$  in a mixture of fluoroethylene carbonate and dimethyl carbonate (FEC/DMC, 1:1 v/v). The discharge/charge characteristics of the samples were investigated by cycling over a potential range of 0.001–3 V at various current densities. Cyclic voltammograms were measured at a scan rate of  $0.1 \text{ mV s}^{-1}$ . The size of the  $\text{Fe}_2\text{O}_3$  powders negative electrode was  $1 \text{ cm} \times 1 \text{ cm}$  and the mass loading was approximately  $1.2 \text{ mg cm}^{-2}$ .

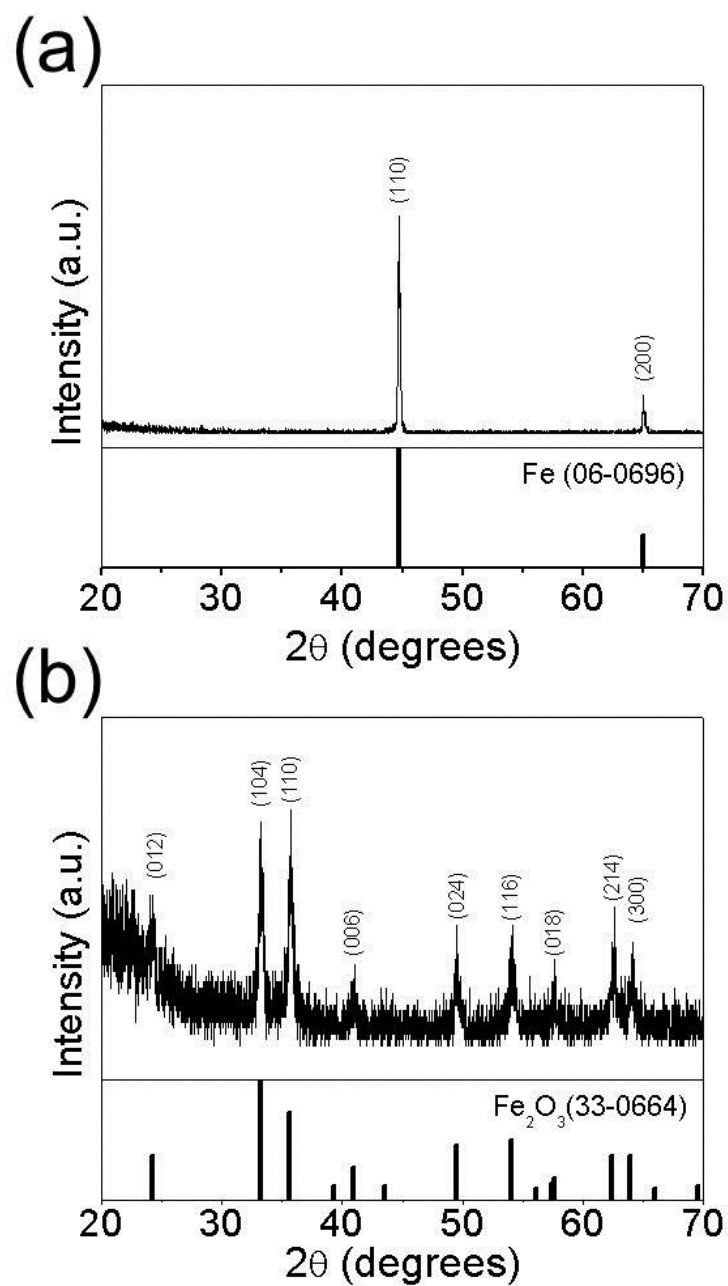

**Figure S1.** XRD patterns of the powders (a) post-treated at 500 °C under H<sub>2</sub>/Ar mixed gas atmosphere and (b) subsequent heat-treated at 300 °C under air atmosphere.

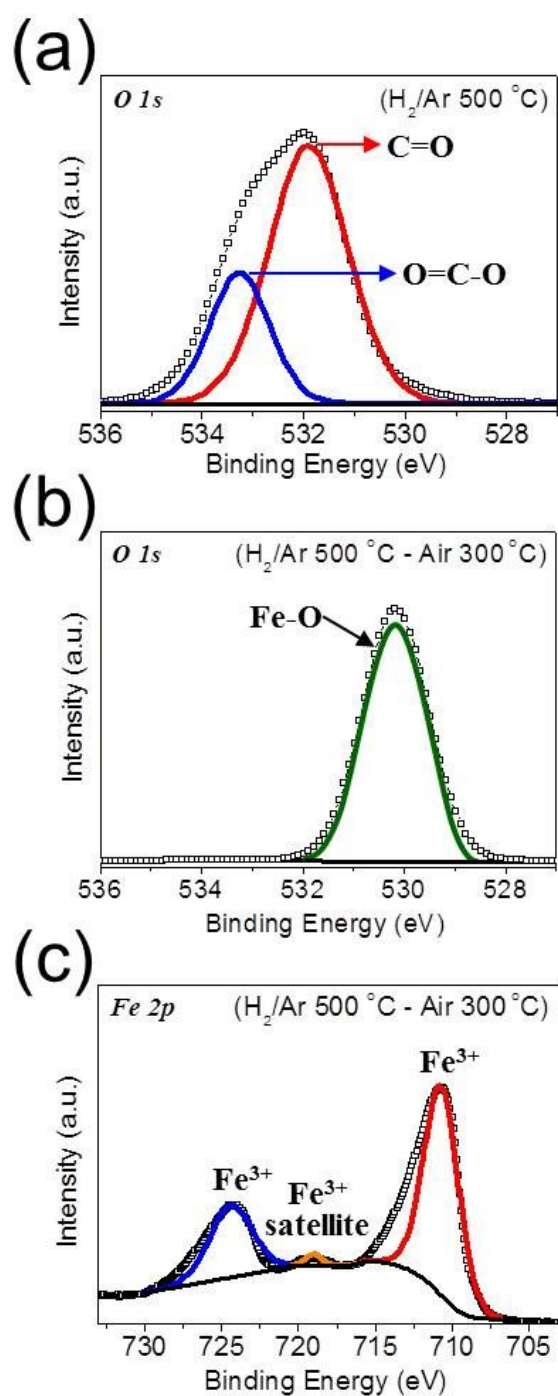

**Figure S2.** XPS spectra of the powders: (a) O 1s spectrum of the Fe-carbon composite powders post-treated at 500 °C under H<sub>2</sub>/Ar mixed gas atmosphere, (b) O 1s and (c) Fe 2p spectra of the hollow Fe<sub>2</sub>O<sub>3</sub> nanosphere aggregates subsequent heat treated at 300 °C under air atmosphere.

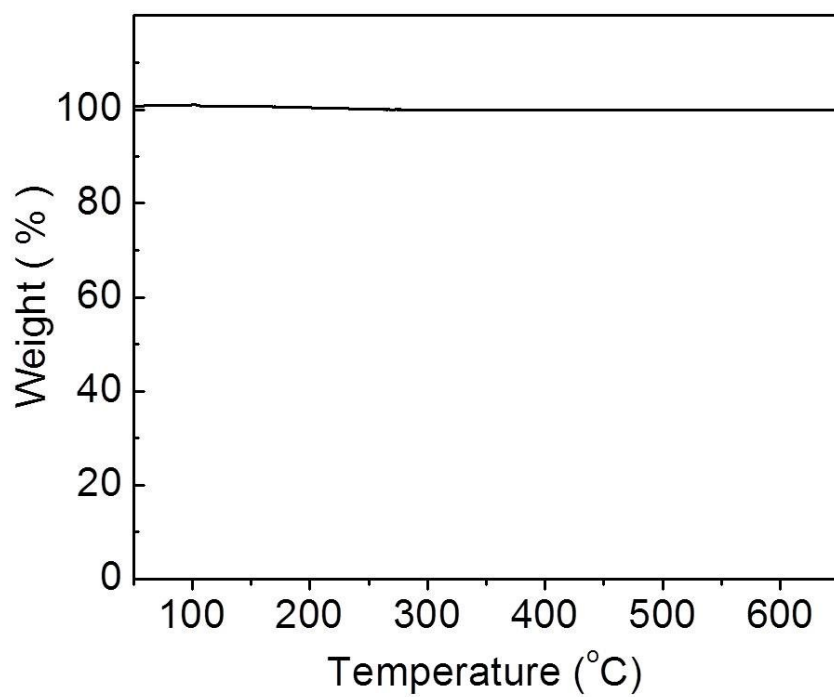

**Figure S3.** Thermogravimetric curve of the hollow Fe<sub>2</sub>O<sub>3</sub> nanosphere aggregates.

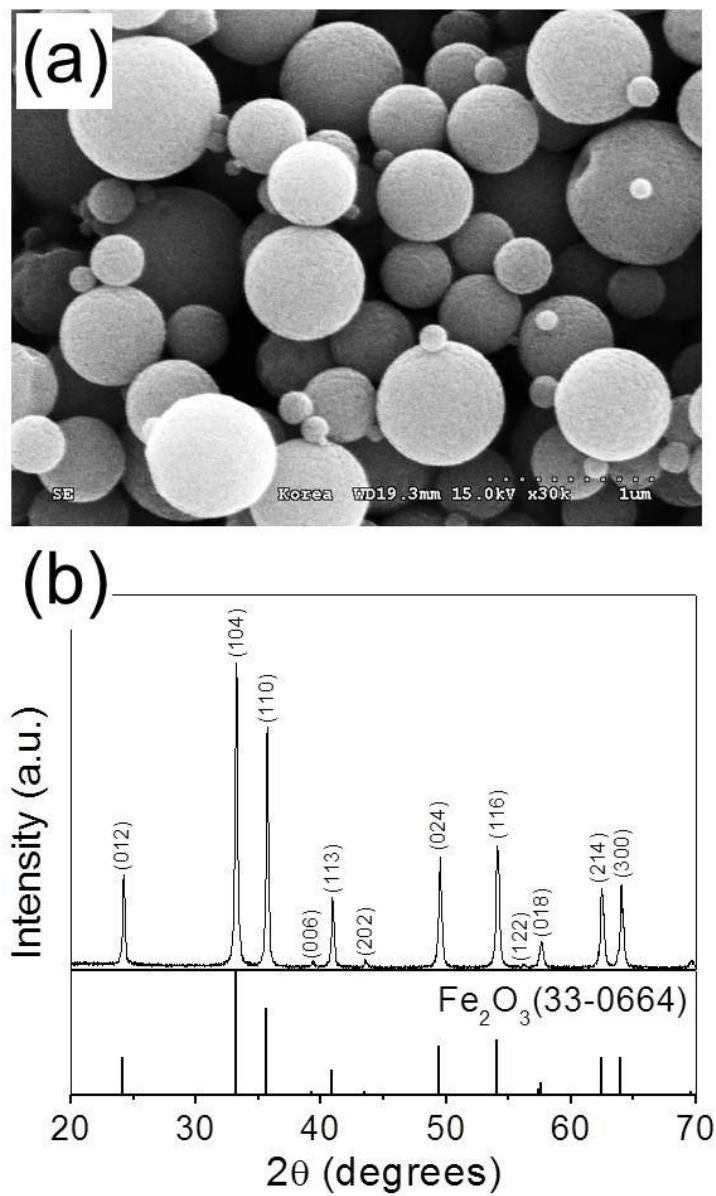

**Figure S4.** SEM image and XRD pattern of the solid Fe<sub>2</sub>O<sub>3</sub> powders prepared by spray pyrolysis.



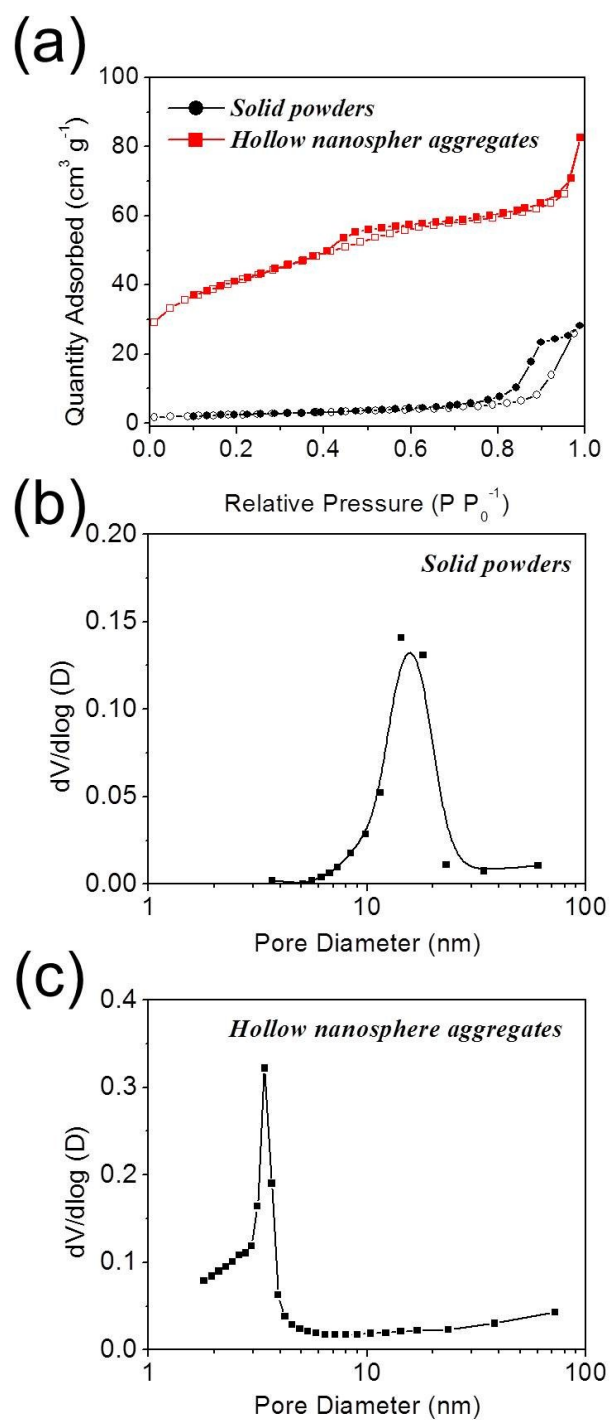

**Figure S5.** (a) N<sub>2</sub> gas adsorption and desorption isotherms and pore size distributions of (b) solid Fe<sub>2</sub>O<sub>3</sub> powders, and (c) hollow Fe<sub>2</sub>O<sub>3</sub> nanosphere aggregates.

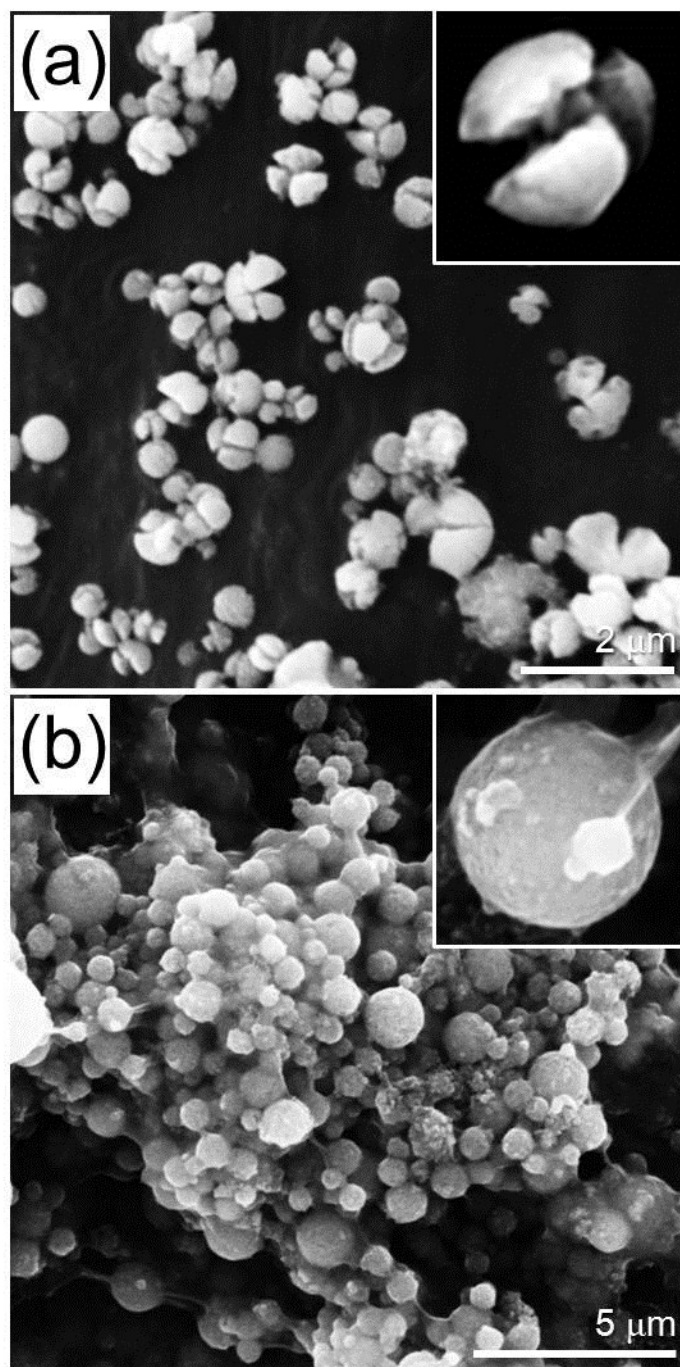

**Figure S6.** SEM images of (a) solid  $\text{Fe}_2\text{O}_3$  powders and (b) hollow  $\text{Fe}_2\text{O}_3$  nanosphere aggregates obtained after first cycle.

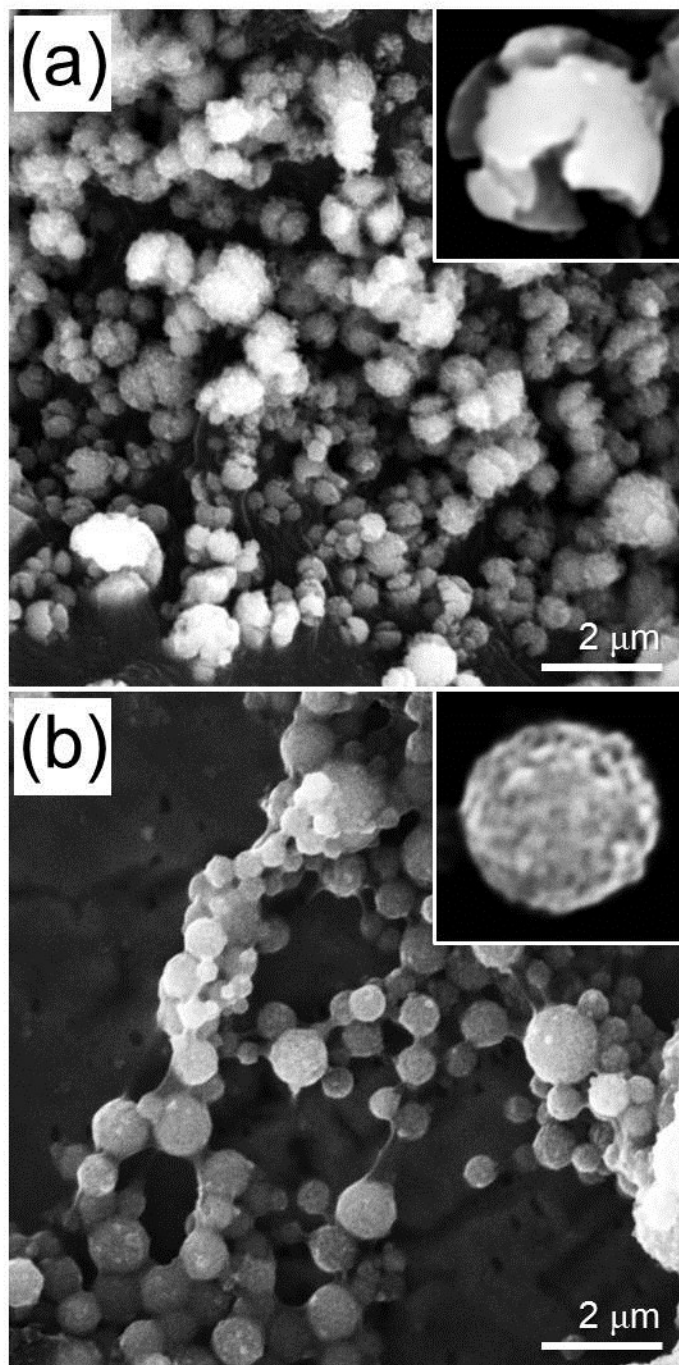

**Figure S7.** SEM images of (a) solid  $\text{Fe}_2\text{O}_3$  powders and (b) hollow  $\text{Fe}_2\text{O}_3$  nanosphere aggregates obtained after 100 cycles.

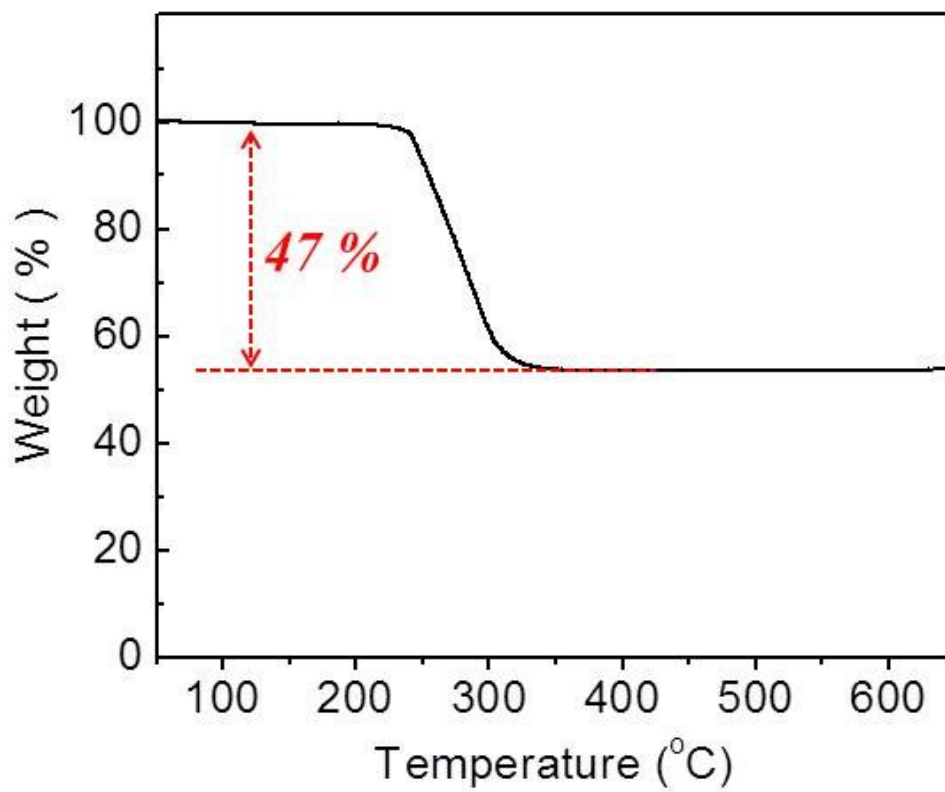

**Figure S8.** TG analysis of Fe-carbon composite powders post-treated at 500 °C under H<sub>2</sub>/Ar mixed gas atmosphere.

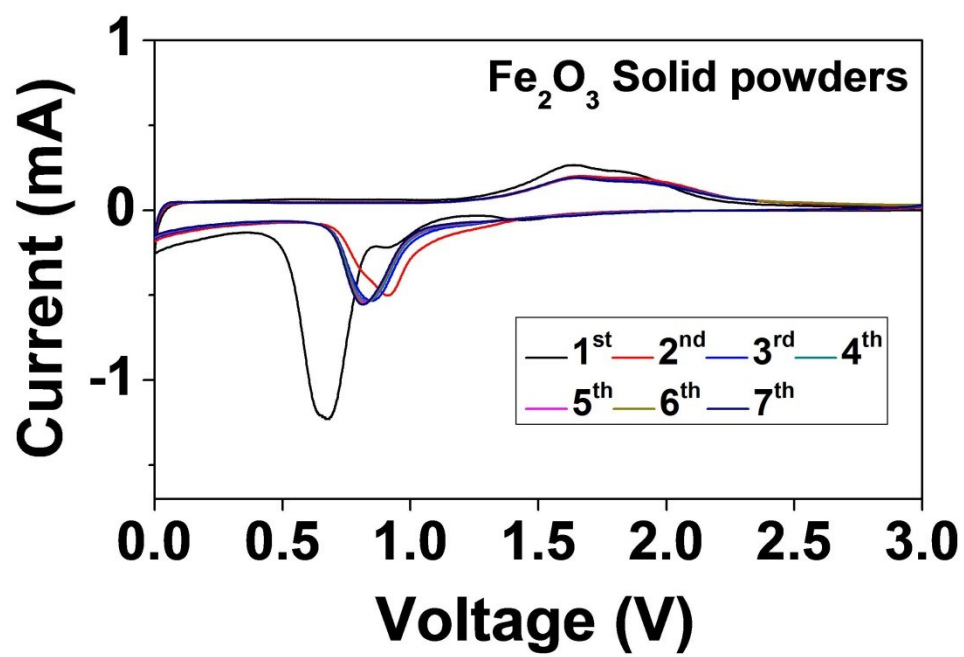

**Fig. S9.** Cyclic voltammetry (CV) curves of the solid Fe<sub>2</sub>O<sub>3</sub> powders for the first 7 cycles at a scan rate of 0.1 mV s<sup>-1</sup>.
